# Supplementary material for: Head-mounted central venous access during optical recordings and manipulations of neural activity in mice
Source: Springer Nature journal article supplement (doi:10.1038/s41596-023-00928-2), 2023-12-06
Supplement: MOESM1 [file 41596_2023_928_MOESM1_ESM9.pdf]

# Head-mounted central venous access during optical recordings and manipulations of neural activity in mice

In the format provided by the authors and unedited

4

3

2

1

D

D

C

C

B

B

A

A

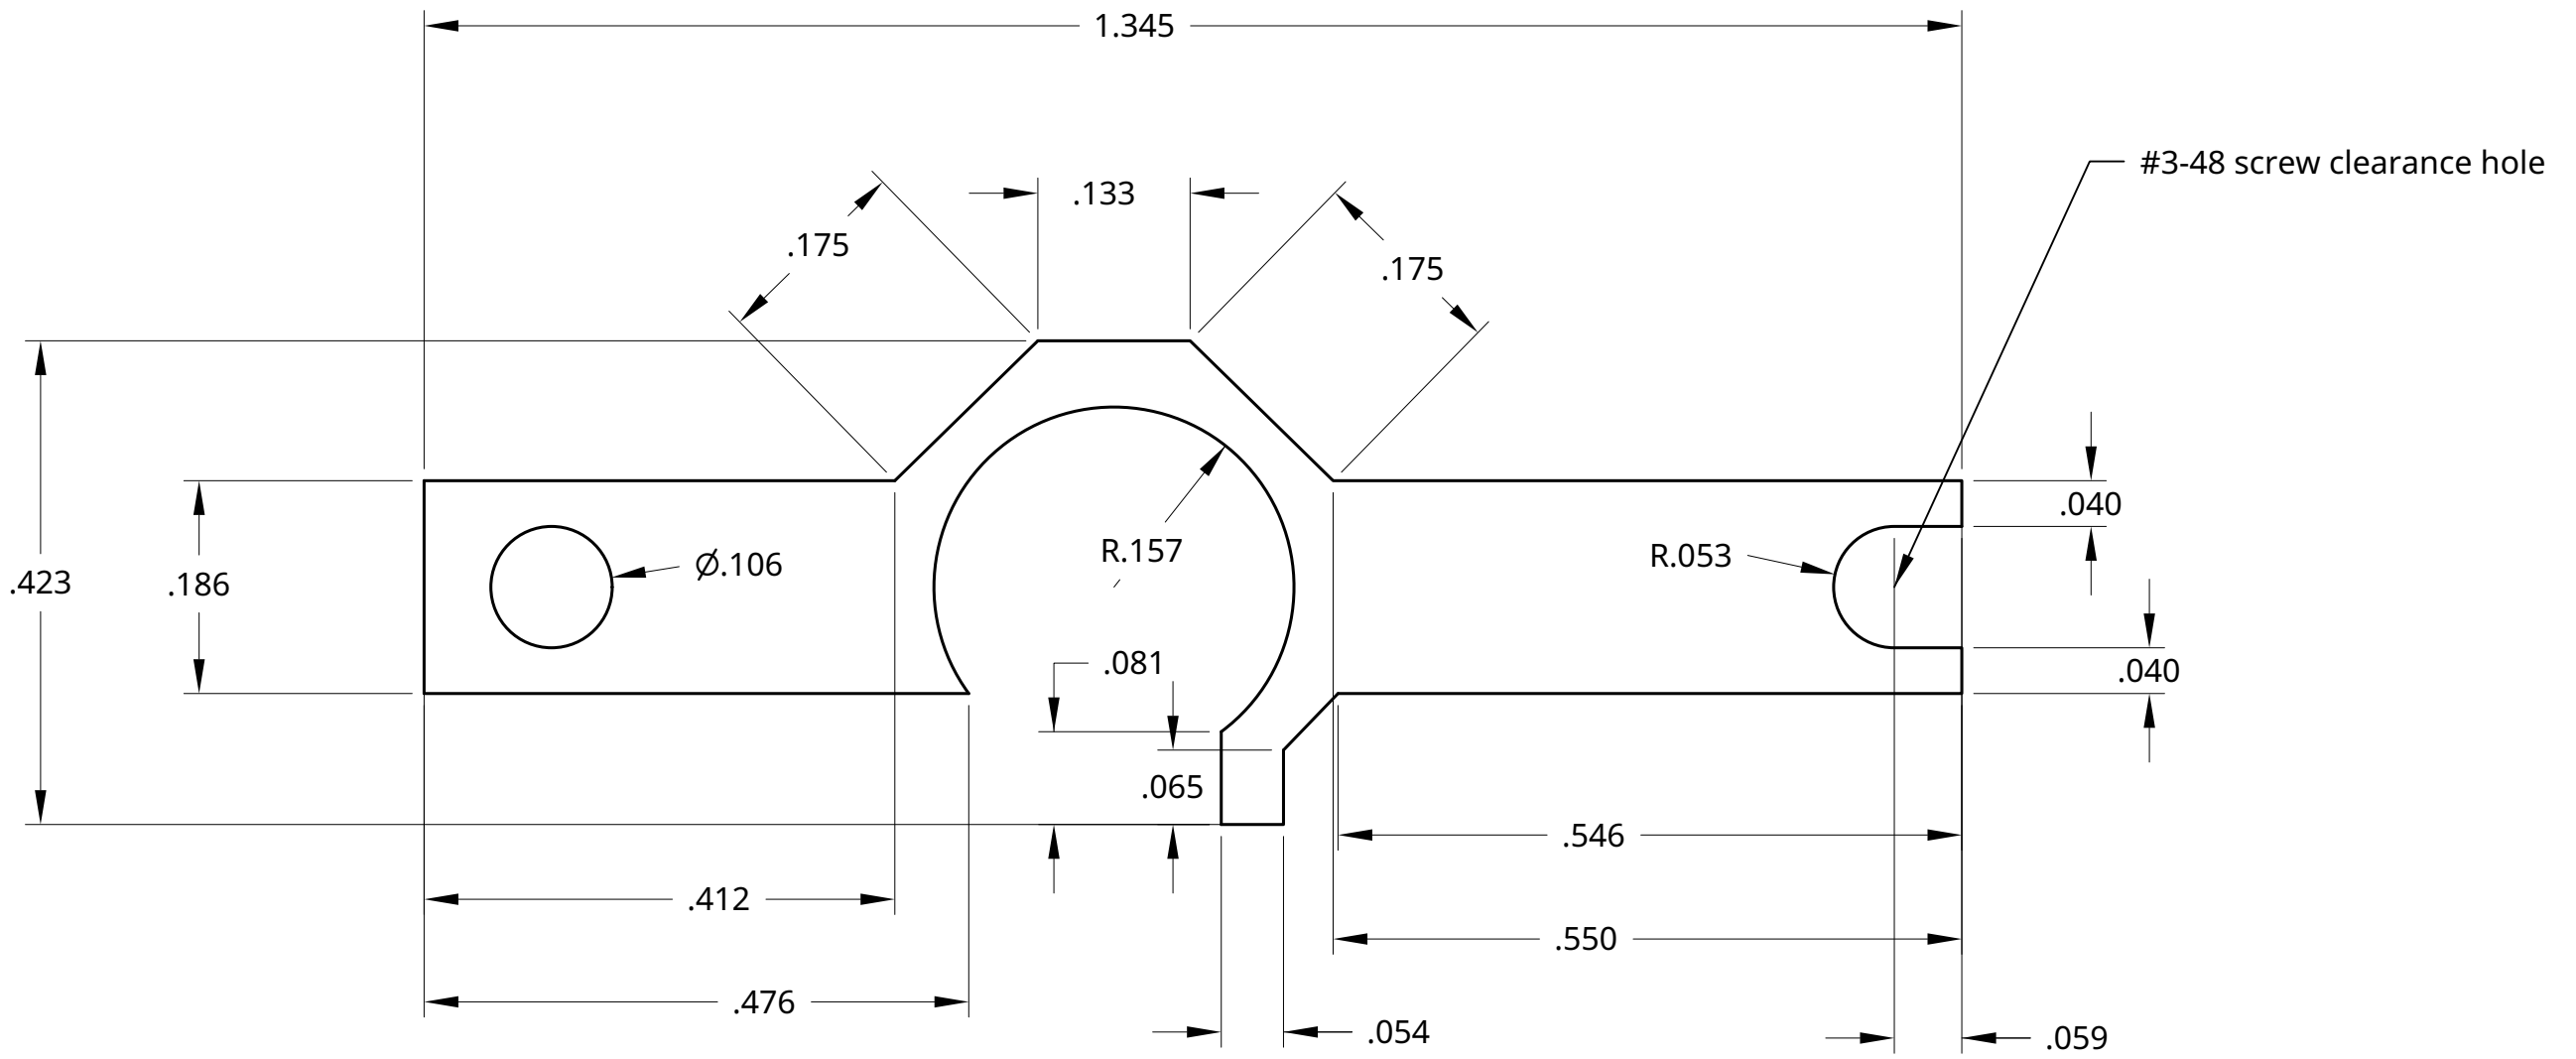

All measurements in inches  
 Part cut from sheet metal  
 Aluminum 6061  
 Thickness = 0.031"

UNLESS OTHERWISE SPECIFIED,  
 DIMENSIONS ARE IN INCHES

.XX = ±.0-      ANGULAR = ± °  
 .XXX = ±.00-    FRACTIONAL = ±  
 .XXXX = ±.000-

SURFACE FINISH

DO NOT SCALE DRAWING

BREAK ALL SHARP EDGES AND  
 REMOVE BURRS

THIRD ANGLE PROJECTION

|                   |         |       |        |
|-------------------|---------|-------|--------|
| TITLE             |         |       |        |
| Lammel_headplates |         |       |        |
| SIZE              | DWG NO. | REV.  |        |
| B                 |         |       |        |
| SCALE             | WEIGHT  | SHEET | 1 of 1 |
| 6:1               |         |       |        |

4

3

2

1

**Supplementary Figure 1. Specifications for headplate construction.** Details for lightweight headplates with clearance for neural implants on the surface of the skull and extended wings for head-fixation.
